# Supplementary figures and images for: Preparation and characterization of a novel polysialic acid/gelatin composite hydrogels cross-linked by Tannic acid to improve healing and nursing care of cesarean section dressing
Source: Research Square preprint supplement (doi:10.21203/rs.3.rs-305430/v1), 2021-04-07

**Graphical Abstract**


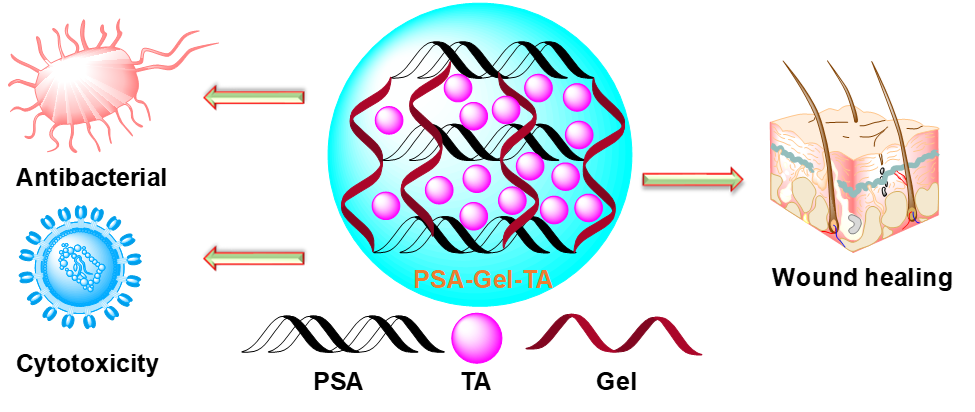

Supplement: Supplementary file 1 [file 8fac176d1360fafe054aaa02.docx]
